# Supplementary material for: Registration bias in a clinical quality register
Source: PubMed Central journal article supplement — Endosc Int Open. 2019 Jan 15;7(1):E90–8. doi: 10.1055/a-0806-7006 (PMC6333534; doi:10.1055/a-0806-7006), 2019-01-15
Supplement: 1248supmat-10-1055-a-0806-7006.pdf [file 1248supmat-10-1055-a-0806-7006.pdf]

## Supplementary data

Supplementary table S1. Case distribution of colonoscopy categories dependent on their progressively increasing procedure times from the 50% with shortest procedure to the 10% with longest procedure times (90-100 percentage). Data are based on procedure times from hospital group 4 with a nearly complete dataset. Clustering of time estimates at 5-minute intervals suggest that individual times are estimates rather than measurements.

| Reported procedure time (mins) | <50 percentile | 50-69 percentile | 70-89 percentile | >=90 percentile | Total no. |
|--------------------------------|----------------|------------------|------------------|-----------------|-----------|
| 1                              | 4              | 0                | 0                | 0               | 4         |
| 2                              | 3              | 0                | 0                | 0               | 3         |
| 3                              | 11             | 0                | 0                | 0               | 11        |
| 4                              | 25             | 0                | 0                | 0               | 25        |
| 5                              | 40             | 0                | 0                | 0               | 40        |
| 6                              | 54             | 0                | 0                | 0               | 54        |
| 7                              | 84             | 0                | 0                | 0               | 84        |
| 8                              | 111            | 0                | 0                | 0               | 111       |
| 9                              | 81             | 0                | 0                | 0               | 81        |
| 10                             | <b>219</b>     | 0                | 0                | 0               | 219       |
| 11                             | 174            | 0                | 0                | 0               | 174       |
| 12                             | 329            | 0                | 0                | 0               | 329       |
| 13                             | 281            | 0                | 0                | 0               | 281       |
| 14                             | 289            | 0                | 0                | 0               | 289       |
| 15                             | <b>562</b>     | 0                | 0                | 0               | 562       |
| 16                             | 401            | 0                | 0                | 0               | 401       |
| 17                             | 337            | 0                | 0                | 0               | 337       |
| 18                             | 376            | 0                | 0                | 0               | 376       |
| 19                             | 176            | 0                | 0                | 0               | 176       |
| 20                             | 0              | <b>565</b>       | 0                | 0               | 565       |
| 21                             | 0              | 139              | 0                | 0               | 139       |
| 22                             | 0              | 232              | 0                | 0               | 232       |
| 23                             | 0              | 136              | 0                | 0               | 136       |
| 24                             | 0              | 121              | 0                | 0               | 121       |
| 25                             | 0              | <b>308</b>       | 0                | 0               | 308       |
| 26                             | 0              | 0                | 112              | 0               | 112       |
| 27                             | 0              | 0                | 96               | 0               | 96        |
| 28                             | 0              | 0                | 105              | 0               | 105       |
| 29                             | 0              | 0                | 61               | 0               | 61        |
| 30                             | 0              | 0                | <b>264</b>       | 0               | 264       |
| 31                             | 0              | 0                | 49               | 0               | 49        |
| 32                             | 0              | 0                | 80               | 0               | 80        |
| 33                             | 0              | 0                | 68               | 0               | 68        |
| 34                             | 0              | 0                | 60               | 0               | 60        |

|    |   |   |            |            |     |
|----|---|---|------------|------------|-----|
| 35 | 0 | 0 | <b>145</b> | 0          | 145 |
| 36 | 0 | 0 | 44         | 0          | 44  |
| 37 | 0 | 0 | 47         | 0          | 47  |
| 38 | 0 | 0 | 56         | 0          | 56  |
| 39 | 0 | 0 | 32         | 0          | 32  |
| 40 | 0 | 0 | <b>170</b> | 0          | 170 |
| 41 | 0 | 0 | 23         | 0          | 23  |
| 42 | 0 | 0 | 0          | 28         | 28  |
| 43 | 0 | 0 | 0          | 31         | 31  |
| 44 | 0 | 0 | 0          | 32         | 32  |
| 45 | 0 | 0 | 0          | <b>86</b>  | 86  |
| 46 | 0 | 0 | 0          | 22         | 22  |
| 47 | 0 | 0 | 0          | 22         | 22  |
| 48 | 0 | 0 | 0          | 17         | 17  |
| 49 | 0 | 0 | 0          | 16         | 16  |
| 50 | 0 | 0 | 0          | <b>108</b> | 108 |
| 51 | 0 | 0 | 0          | 13         | 13  |
| 52 | 0 | 0 | 0          | 19         | 19  |
| 53 | 0 | 0 | 0          | 19         | 19  |
| 54 | 0 | 0 | 0          | 14         | 14  |
| 55 | 0 | 0 | 0          | <b>33</b>  | 33  |
| 56 | 0 | 0 | 0          | 15         | 15  |
| 57 | 0 | 0 | 0          | 17         | 17  |
| 58 | 0 | 0 | 0          | 11         | 11  |
| 59 | 0 | 0 | 0          | 7          | 7   |
| 60 | 0 | 0 | 0          | <b>49</b>  | 49  |
| 61 | 0 | 0 | 0          | 8          | 8   |
| 62 | 0 | 0 | 0          | 10         | 10  |
| 63 | 0 | 0 | 0          | 7          | 7   |
| 64 | 0 | 0 | 0          | 3          | 3   |
| 65 | 0 | 0 | 0          | <b>12</b>  | 12  |
| 66 | 0 | 0 | 0          | 10         | 10  |
| 67 | 0 | 0 | 0          | 4          | 4   |
| 68 | 0 | 0 | 0          | 6          | 6   |
| 69 | 0 | 0 | 0          | 4          | 4   |
| 70 | 0 | 0 | 0          | <b>26</b>  | 26  |
| 71 | 0 | 0 | 0          | 2          | 2   |
| 72 | 0 | 0 | 0          | 3          | 3   |
| 73 | 0 | 0 | 0          | 4          | 4   |
| 74 | 0 | 0 | 0          | 2          | 2   |
| 75 | 0 | 0 | 0          | <b>17</b>  | 17  |
| 76 | 0 | 0 | 0          | 3          | 3   |
| 77 | 0 | 0 | 0          | 3          | 3   |
| 78 | 0 | 0 | 0          | 2          | 2   |
| 79 | 0 | 0 | 0          | 1          | 1   |

|           |      |      |      |           |       |
|-----------|------|------|------|-----------|-------|
| 80        | 0    | 0    | 0    | <b>9</b>  | 9     |
| 82        | 0    | 0    | 0    | 1         | 1     |
| 83        | 0    | 0    | 0    | 2         | 2     |
| 85        | 0    | 0    | 0    | 1         | 1     |
| 86        | 0    | 0    | 0    | 1         | 1     |
| 87        | 0    | 0    | 0    | 2         | 2     |
| 89        | 0    | 0    | 0    | 1         | 1     |
| 90        | 0    | 0    | 0    | <b>11</b> | 11    |
| 92        | 0    | 0    | 0    | 1         | 1     |
| 93        | 0    | 0    | 0    | 1         | 1     |
| 94        | 0    | 0    | 0    | 1         | 1     |
| 96        | 0    | 0    | 0    | 3         | 3     |
| 100       | 0    | 0    | 0    | 1         | 1     |
| 105       | 0    | 0    | 0    | 1         | 1     |
| 109       | 0    | 0    | 0    | 1         | 1     |
| 110       | 0    | 0    | 0    | 2         | 2     |
| 111       | 0    | 0    | 0    | 1         | 1     |
| 112       | 0    | 0    | 0    | 1         | 1     |
| 114       | 0    | 0    | 0    | 1         | 1     |
| 115       | 0    | 0    | 0    | 1         | 1     |
| 117       | 0    | 0    | 0    | 1         | 1     |
| 118       | 0    | 0    | 0    | 1         | 1     |
| 120       | 0    | 0    | 0    | 4         | 4     |
| 121       | 0    | 0    | 0    | 1         | 1     |
| 135       | 0    | 0    | 0    | 1         | 1     |
| 140       | 0    | 0    | 0    | 1         | 1     |
| 150       | 0    | 0    | 0    | 1         | 1     |
| Total no. | 3557 | 1501 | 1412 | 739       | 7209  |
| Percent   | 49 % | 21 % | 20 % | 10 %      | 100 % |

Supplementary table S2. Possible reasons for a relationship between procedure times (and time-dependent registration completeness) and the frequency of reported adverse events.

| Possible reasons for association between adverse events and procedure times        | Probability of suggested reasons in the present study | Arguments                                                                                                                                                                                                                 |
|------------------------------------------------------------------------------------|-------------------------------------------------------|---------------------------------------------------------------------------------------------------------------------------------------------------------------------------------------------------------------------------|
| Adverse events to be dealt with during colonoscopy may prolong procedure time      | Low                                                   | Most adverse events emerged clinically only after the patient had left the premises. Procedure times were similar for colonoscopies with adverse events emerging <i>during</i> as compared to <i>after</i> the procedure. |
| Adverse events are more frequent in therapeutic than purely diagnostic colonoscopy | Low                                                   | Higher risk of adverse events during or after therapeutic colonoscopy was verified in the univariable logistic regression analysis, but its significance disappeared in the multivariable analysis.                       |
| Patient characteristics                                                            | Low                                                   | Age, sex and perception of pain were not identified to play significant roles in the multivariable analysis.                                                                                                              |
| Endoscopist characteristics                                                        | Uncertain                                             | Data on individual endoscopists were not provided                                                                                                                                                                         |
| Organizational characteristics                                                     | High                                                  | Longer procedure times and low frequency of adverse events were observed in centres with low reporting coverage.                                                                                                          |
| Unknown factors                                                                    | High                                                  |                                                                                                                                                                                                                           |

## Patient's, colonoscopy form

We kindly ask you to fill in this questionnaire on the day after your colonoscopy and mail your replies using the pre-paid envelope

Questionnaire no \_\_\_\_\_

Centre no. \_\_\_\_\_

Date \_\_\_\_\_

No      Yes, a little      Moderate      Severe

### Questions about the examination

|                                                                                          |                          |                          |                          |                          |
|------------------------------------------------------------------------------------------|--------------------------|--------------------------|--------------------------|--------------------------|
| Was the examination painful?                                                             | <input type="checkbox"/> | <input type="checkbox"/> | <input type="checkbox"/> | <input type="checkbox"/> |
| 1. Did you have colicky pain or other discomfort after the examination?                  | <input type="checkbox"/> | <input type="checkbox"/> | <input type="checkbox"/> | <input type="checkbox"/> |
| 2. Are you satisfied with how you were treated at the centre?                            | <input type="checkbox"/> | <input type="checkbox"/> | <input type="checkbox"/> | <input type="checkbox"/> |
| 3. Are you satisfied with information given about the examination?                       | <input type="checkbox"/> | <input type="checkbox"/> | <input type="checkbox"/> | <input type="checkbox"/> |
|                                                                                          | <b>Yes</b>               | <b>No</b>                |                          |                          |
| 4. Did you have any involuntary "leakage" on your way <b>to</b> the examination?         | <input type="checkbox"/> | <input type="checkbox"/> |                          |                          |
| 5. Did you have any involuntary "leakage" on your way home <b>after</b> the examination? | <input type="checkbox"/> | <input type="checkbox"/> |                          |                          |

Not at all      Slightly      Moderately      Greatly

### Questions about bowel cleansing

|                                                                |                          |                          |                          |                          |
|----------------------------------------------------------------|--------------------------|--------------------------|--------------------------|--------------------------|
| 6. Was the recipe for bowel cleansing difficult to understand? | <input type="checkbox"/> | <input type="checkbox"/> | <input type="checkbox"/> | <input type="checkbox"/> |
| 7. Did the bowel cleansing taste badly?                        | <input type="checkbox"/> | <input type="checkbox"/> | <input type="checkbox"/> | <input type="checkbox"/> |
| 8. Did the bowel cleansing cause abdominal pain?               | <input type="checkbox"/> | <input type="checkbox"/> | <input type="checkbox"/> | <input type="checkbox"/> |
| 9. Did the bowel cleansing cause nausea?                       | <input type="checkbox"/> | <input type="checkbox"/> | <input type="checkbox"/> | <input type="checkbox"/> |
| 10. Did the bowel cleansing cause bloating?                    | <input type="checkbox"/> | <input type="checkbox"/> | <input type="checkbox"/> | <input type="checkbox"/> |
| 11. Did the bowel cleansing cause headache?                    | <input type="checkbox"/> | <input type="checkbox"/> | <input type="checkbox"/> | <input type="checkbox"/> |
|                                                                | <b>Yes</b>               | <b>No</b>                |                          |                          |
| 12. Did the bowel cleansing give other symptoms?               | <input type="checkbox"/> | <input type="checkbox"/> |                          |                          |

If 'yes', please specify (use the back of the sheet if needed):

Other comments (use the back of the sheet if needed):

MD1

MD2

Nurse1

Nurse2

## Endoscopist Colonoscopy form

This form is to be filled in by endoscopist and/or nurse and returned to Gastronet.

Form i.d. no \_\_\_\_\_

Centre no. \_\_\_\_\_

|                                                                                   |                                                                                                |                                                     |
|-----------------------------------------------------------------------------------|------------------------------------------------------------------------------------------------|-----------------------------------------------------|
| Date:                                                                             | 1st referral for present complaint: Yes <input type="checkbox"/> No <input type="checkbox"/> , | Air insufflation <input type="checkbox"/>           |
|                                                                                   | If Yes, date of referral:                                                                      | CO2 insufflation <input type="checkbox"/>           |
|                                                                                   |                                                                                                | Water only to left flexure <input type="checkbox"/> |
| Handed out patient form: Yes <input type="checkbox"/> No <input type="checkbox"/> |                                                                                                | If 'No', state reason _____                         |

| Sedation/analgetics given:                                    |  | What Sedation/analgetics were administered: |                          |
|---------------------------------------------------------------|--|---------------------------------------------|--------------------------|
| No <input type="checkbox"/>                                   |  | Midazolam , <input type="checkbox"/> mg     | Rapifen mikrog           |
| Yes, before start(+/- during exam.) <input type="checkbox"/>  |  | Pethidin mg                                 | Other ,                  |
| Yes, given during procedure only <input type="checkbox"/>     |  | Fentanyl mikrog                             | Other (free text): _____ |
| Patient declined sedation/analgetics <input type="checkbox"/> |  |                                             |                          |

| Bowel cleansing:                                                    |                                                                                            |
|---------------------------------------------------------------------|--------------------------------------------------------------------------------------------|
| PEG <input type="checkbox"/> litre(total)                           | Cleansing regime as split dosage: Yes <input type="checkbox"/> No <input type="checkbox"/> |
| Picoprep / Citrafleet <input type="checkbox"/>                      |                                                                                            |
| 3-day cleansing (fluid, Bisacodyl, enema): <input type="checkbox"/> |                                                                                            |
| Other <input type="checkbox"/>                                      |                                                                                            |
| (specify): _____                                                    |                                                                                            |

**Cleansing quality (Boston Bowel Preparation Scale): Three segments grade don withdrawal: Scale from 0 to 3, where 0 is worst and 3 is best.**

0=Mucosa not seen, solid stool present. 1= mucosa partly seen, turbid fluid and stool remnants present. 2=Mucosa well visualised, small amounts of turbid fluid and stools. 3=Mucosa completely visualised, no turbid fluid or stools

| +                                              | 0                        | 1                        | 2                        | 3                        | ikke aktuelt             |
|------------------------------------------------|--------------------------|--------------------------|--------------------------|--------------------------|--------------------------|
| Right colon (caecum and ascending colon)       | <input type="checkbox"/> |
| Transversum (inkludes right and left flexures) | <input type="checkbox"/> |
| Left colon (descending, sigmoid, rectum)       | <input type="checkbox"/> |

| Previous surgery:                         |                                                   | Type of colonoscopy:                                          |  |
|-------------------------------------------|---------------------------------------------------|---------------------------------------------------------------|--|
| No surgery: <input type="checkbox"/>      | Gynaecological surgery: <input type="checkbox"/>  | Diagnostic <input type="checkbox"/>                           |  |
| Colon resection: <input type="checkbox"/> | Other abdominal surgery: <input type="checkbox"/> | Therapeutic (exclusive "hot biopsy") <input type="checkbox"/> |  |

| Caecum/ileocolic anastomosis reached        |                           |
|---------------------------------------------|---------------------------|
| (identified ileocoecum or intubated ileum): | Time to caecum (minutes): |

|                              |                                                        |   |                                                                  |
|------------------------------|--------------------------------------------------------|---|------------------------------------------------------------------|
| Yes <input type="checkbox"/> | Not intended to reach caecum <input type="checkbox"/>  | + | min (write 007 for 7 min or it will be scanned as 700 or 70 min) |
| No <input type="checkbox"/>  | Not possible due to stricture <input type="checkbox"/> |   |                                                                  |

**Not reached caecum due to: Undersøkelsens varighet:**

|                                         |                                |                           |
|-----------------------------------------|--------------------------------|---------------------------|
| Stricture <input type="checkbox"/>      | Other <input type="checkbox"/> | min (write 007 for 7 min) |
| Poor cleansing <input type="checkbox"/> | Specify: _____                 |                           |

**Indication for examination: Clinical diagnosis: Endoscopy findings: No. of polyps:**

|                                        |                                       |                                          |                                                                                  |
|----------------------------------------|---------------------------------------|------------------------------------------|----------------------------------------------------------------------------------|
| Symptoms <input type="checkbox"/>      | IBS <input type="checkbox"/>          | Normal findings <input type="checkbox"/> | No. of polyps found<br>(only 5mm or larger)<br>More than 10<br>to be coded as 99 |
| Polypctr <input type="checkbox"/>      | IBD <input type="checkbox"/>          | IBD <input type="checkbox"/>             |                                                                                  |
| CRC ktr <input type="checkbox"/>       | CRC <input type="checkbox"/>          | CRC <input type="checkbox"/>             |                                                                                  |
| CRC in family <input type="checkbox"/> | Other <input type="checkbox"/>        | Polyp(s) <input type="checkbox"/>        |                                                                                  |
| Screening <input type="checkbox"/>     | Constipation <input type="checkbox"/> | Diverticula <input type="checkbox"/>     |                                                                                  |
| IBD ctr <input type="checkbox"/>       |                                       | Other <input type="checkbox"/>           |                                                                                  |
| Other <input type="checkbox"/>         |                                       |                                          |                                                                                  |

**Proksimal SSA/P Prioritize proximal >10mm in boxes below if more than 2 SSA/P**

|                                            |         |                          |                          |                 |                                                          |
|--------------------------------------------|---------|--------------------------|--------------------------|-----------------|----------------------------------------------------------|
| Yes <input type="checkbox"/>               |         | <b>Caec./asc</b>         | <b>Transv</b>            | <b>Diameter</b> | <b>Removed?</b>                                          |
| No <input type="checkbox"/>                | Polyp 1 | <input type="checkbox"/> | <input type="checkbox"/> | mm              | Yes <input type="checkbox"/> No <input type="checkbox"/> |
| for >2, tick here <input type="checkbox"/> | Polyp 2 | <input type="checkbox"/> | <input type="checkbox"/> | mm              | Yes <input type="checkbox"/> No <input type="checkbox"/> |

**Registered complications (observed 'on-site' at the endoscopy centre):**

|                                           |
|-------------------------------------------|
| Yes <input type="checkbox"/>              |
| No <input type="checkbox"/> Specify _____ |

MD 1 MD 2 Nurse 1 Nurse 2
